# Supplementary material for: Evidence Supporting the Internal Validity of the Proposed ND-PAE Disorder
Source: Springer Nature journal article supplement (doi:10.1007/s10578-017-0738-8), 2017-06-20
Supplement: MOESM1 [file 12456402]

**Supplementary Table 1. ND-PAE Symptoms and Rate of Endorsement**

| **Domain** | **Symptom** | **Specific Measure** | **Age Range in Years** | **n** | **% Positive Endorsement (1.5 SD)** | **% Positive Endorsement (1.0 SD)** |
| --- | --- | --- | --- | --- | --- | --- |
| Neurocognitive | Global Intellectual Functioning (NI_1) | DAS: General Conceptual Ability | 3-10 | 56 | 21.4 | 21.4 |
| Neurocognitive | Global Intellectual Functioning (NI_1) | K_BIT Composite | 4-10 | 49 | 18.2 | 18.2 |
| Neurocognitive | Executive Functioning (NI_2) | BRIEF Metacognitive Index | 5-10 | 42 | 51.8 | 60.7 |
| Neurocognitive | Impairment In Learning (NI_3) | TEMA SS | 3-8 | 50 | 25.0 | 53.6 |
| Neurocognitive | Impairment In Learning (NI_3) | KEYMATH TOTAL SS | 5-10 | 42 | 19.0 | 47.6 |
| Neurocognitive | Impairment In Learning (NI_3) | TERA SS | 3.5-8.5 | 42 | 35.7 | 48.2 |
| Neurocognitive | Impairment In Learning (NI_3) | Receiving SPEC Ed | 3-10 | 48 | 68.8 | 68.8 |
| Neurocognitive | Impairment In Learning (NI_3) | Has An IEP | 3-10 | 47 | 72.3 | 72.3 |
| Neurocognitive | Impairment In Learning (NI_3) | Repeated a grade | 5-10 | 45 | 31.1 | 31.1 |
| Neurocognitive | Impairment In Memory (NI_4) | WISC_3 Letter Span | 6-10 | 31 | 16.1 | 32.1 |
| Neurocognitive | Impairment In Memory (NI_4) | WISC-3 Spatial Span Total | 6-10 | 31 | 19.6 | 33.9 |
| Neurocognitive | Impairment In Memory (NI_4) | WISC-3 Spatial Span Forward | 6-10 | 31 | 21.4 | 33.9 |
| Neurocognitive | Impairment In Memory (NI_4) | WISC-3 Spatial Span Backwards | 6-10 | 31 | 19.6 | 30.4 |
| Neurocognitive | Impairment In Memory (NI_4) | WIII-Auditory Working Memory | 3-10 | 43 | 5.5 | 23.6 |
| Neurocognitive | Impairment In Visual-Spatial Reasoning (NI_5) | K-BIT Matrices | 4-10 | 49 | 18.2 | 41.8 |
| Neurocognitive | Impairment In Visual-Spatial Reasoning (NI_5) | Visual SS from VMI | 3-10 | 56 | 41.1 | 57.1 |
| Neurocognitive | Impairment In Visual-Spatial Reasoning (NI_5) | DAS: Nonverbal | 3-10 | 50 | 28.6 | 55.4 |
| Neurocognitive | Impairment In Visual-Spatial Reasoning (NI_5) | DAS: Spatial | 6-10 | 31 | 19.6 | 32.1 |
| Neurocognitive | Impairment In Visual-Spatial Reasoning (NI_5) | WJIII-Spatial Relations | 3-10 | 42 | 10.9 | 25.5 |
| Neurocognitive | Impairment In Visual-Spatial Reasoning (NI_5) | WJIII-Visual Matching | 3-10 | 46 | 29.1 | 34.5 |
| Self-Regulation | Impairment In Mood & Behavioral Regulation (SR_1) | BRIEF Behavioral Regulation Index | 5-10 | 42 | 53.6 | 60.7 |
| Self-Regulation | Impairment In Mood & Behavioral Regulation (SR_1) | CBCL Total Problems | 3-10 | 56 | 60.7 | 78.6 |
| Self-Regulation | Impairment In Mood & Behavioral Regulation (SR_1) | Tester Rating of Calmness vs Anxiousness | 5-10 | 40 | 22.5 | 22.5 |
| Self-Regulation | Impairment In Mood & Behavioral Regulation (SR_1) | Tester Rating of Behaves Appropriately or Not | 5-10 | 40 | 22.5 | 22.5 |
| Self-Regulation | Attention Deficit (SR_2) | CBCL Attention | 3-10 | 56 | 62.5 | 83.9 |
| Self-Regulation | Attention Deficit (SR_2) | CBCL DSM ADHD | 3-10 | 56 | 53.6 | 75.0 |
| Self-Regulation | Attention Deficit (SR_2) | Medical Diagnosis-ADHD or ADHD Medications | 3-10 | 56 | 31.3 | 31.3 |
| Self-Regulation | Attention Deficit (SR_2) | NEPSY Visual Attention | 3-10 | 44 | 10.7 | 25.0 |
| Self-Regulation | Attention Deficit (SR_2) | Tester Rating Attentive vs Distractibility | 3-10 | 50 | 42.5 | 42.5 |
| Self-Regulation | Impairment In Impulse Control (SR_3) | CBCL Rule Breaking/Aggression | 3-10 | 56 | 46.4 | 58.9 |
| Self-Regulation | Impairment In Impulse Control (SR_3) | Tester Rating Fidgety vs. Lethargic | 5-10 | 40 | 47.5 | 47.5 |
| Self-Regulation | Impairment In Impulse Control (SR_3) | Tester Rating Deliberate vs. Impulsive | 5-10 | 40 | 47.5 | 47.5 |
| Self-Regulation | Impairment In Impulse Control (SR_3) | Tester Rating Methodical vs. Haphazard | 5-10 | 40 | 32.5 | 32.5 |
| Adaptive Functioning | Adaptive Communication Deficit (AF_1) | VABS Communication | 3-10 | 56 | 42.9 | 57.1 |
| Adaptive Functioning | Adaptive Communication Deficit (AF_1) | Figurative Language Total | 5-10 | 39 | 29.6 | 46.3 |
| Adaptive Functioning | Adaptive Social Impairment (AF_2) | VABS Socialization | 3-10 | 56 | 44.6 | 60.7 |
| Adaptive Functioning | Adaptive Social Impairment (AF_2) | SSRS Social Skills | 3-10 | 45 | 35.6 | 53.3 |
| Adaptive Functioning | Adaptive Social Impairment (AF_2) | CBCL Social Competence | 6-10 | 31 | 45.2 | 58.1 |
| Adaptive Functioning | Adaptive Social Impairment (AF_2) | SSRS Problems | 3-10 | 45 | 40.0 | 53.3 |
| Adaptive Functioning | Adaptive Impairment In Daily Living (AF_3) | VABS Daily Living Skills | 3-10 | 56 | 39.3 | 62.5 |
| Adaptive Functioning | Adaptive Impairment In Daily Living (AF_3) | CBCL Total Competence | 6-10 | 31 | 51.6 | 77.4 |
| Adaptive Functioning | Adaptive Motor Impairment (AF_4) | VABS Motor Domain | 3-6 | 28 | 32.1 | 50.0 |
| Adaptive Functioning | Adaptive Motor Impairment (AF_4) | VMI | 3-10 | 56 | 23.2 | 41.1 |
